# Supplementary material
Source: Elsevier journal article supplement (https://www.sciencedirect.com/science/article/pii/S0213005X1930312X)

# CUESTIONARIO DRIVE03

Edad

0123456789

Sexo

V

H

Pruebas

VHC

P

N

VIH

P

N

Etiqueta

Zona

Europa Occidental

Europa Este

Sudamérica

Asia

África

Otros

Nivel de estudios

Sin estudios

Básicos

Medios

Universitarios

|   |                                                                                                                                                                                                                     | Sí | No |
|---|---------------------------------------------------------------------------------------------------------------------------------------------------------------------------------------------------------------------|----|----|
| 1 | ¿Ha tenido/Tiene relaciones sexuales en los últimos 30 años que hayan comportado algún riesgo para adquirir la infección por VIH/sida? Sólo se considera seguro una pareja cerrada o si siempre se usa preservativo |    |    |
| 2 | ¿Ha tenido/tiene pareja con infección por VIH o VHC?                                                                                                                                                                |    |    |
| 3 | ¿Ha tenido/tiene relaciones homosexuales?                                                                                                                                                                           |    |    |
| 4 | ¿Le han transfundido alguna vez antes de 1990?                                                                                                                                                                      |    |    |
| 5 | ¿Ha utilizado/utiliza drogas ilícitas por vía intravenosa?                                                                                                                                                          |    |    |
| 6 | ¿Cree que ha podido tener algún riesgo para adquirir la infección por VIH/VHC por exposición?                                                                                                                       |    |    |

Señale si ha tenido o tiene:

|    |                                                                                                  |  |  |
|----|--------------------------------------------------------------------------------------------------|--|--|
| 7  | Infección de transmisión sexual (sífilis, Gonorrea, uretritis chlamydia, herpes, linfogranuloma) |  |  |
| 8  | Linfoma                                                                                          |  |  |
| 9  | Cáncer o displasia anal/cervical                                                                 |  |  |
| 10 | Herpes Zóster                                                                                    |  |  |
| 11 | Hepatitis B/C o enfermedad hepática no explicada                                                 |  |  |
| 12 | Síndrome Mononucleósido                                                                          |  |  |
| 13 | Trombopenia/Linfopenia inexplicada                                                               |  |  |
| 14 | Dermatitis Seborreica                                                                            |  |  |
| 15 | Fiebre no explicada                                                                              |  |  |
| 16 | Candidiasis oral o vaginal de repetición sin toma de antibióticos                                |  |  |
| 17 | Leucoplasia vellosa oral                                                                         |  |  |
| 18 | Diarrea prolongada (>3 meses) no explicada                                                       |  |  |
| 19 | Pérdida de peso no explicada                                                                     |  |  |
| 20 | Tuberculosis                                                                                     |  |  |
| 21 | Neumonía                                                                                         |  |  |
| 22 | ¿Se ha realizado el test de VIH en los dos últimos años?                                         |  |  |
| 23 | ¿Ha acudido a algún centro sanitario en los dos últimos años? Marque cuál                        |  |  |

Urgencias

Médico Cabecera

Especialistas

Médico del trabajo

Rellenar huecos tanto como sea posible

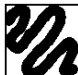

Supplement: mmc1 [file S0213005X1930312X:mmc1.pdf]
